# Supplementary material
Source: PubMed Central journal article supplement (PMC3295595)
Supplement: NIHMS352120-supplement-05.pdf [file NIHMS352120-supplement-05.pdf]

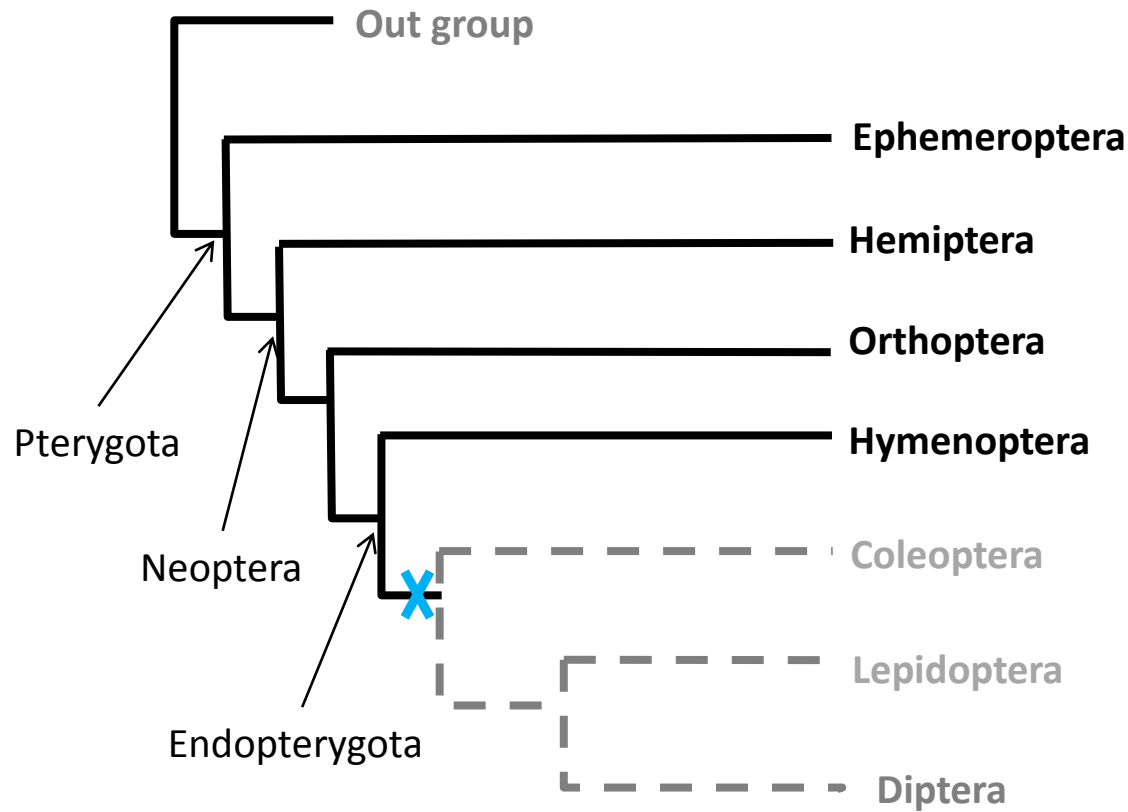

**Figure S5. Phylogenetic distribution of Shisa-like proteins in Pterygota insects.** The topology of this tree is drawn according to Figure 2 in a recent phylogenomic study of arthropods by Meusemann, et al. 2010 (pubmed id: 20534705). Shisa-like proteins are present in Ephemeroptera, Hemiptera, Orthoptera and Hymenoptera. They are absent from Coleoptera, Lepidoptera and Diptera (marked by dashed lines). The proposed gene loss event is marked by a blue cross.
