# Supplementary material
Source: PubMed Central journal article supplement (PMC3295595)
Supplement: NIHMS352120-supplement-07.pdf [file NIHMS352120-supplement-07.pdf]

Tetrahymena:

154841372\_Tetr.the.Ciliophora
TYGSSSY-----SYYYTSP-----GYVYCT-----TEGCG-----NYVSSG...
GVGFTD-----TTTYTSS-----GYVYCT-----SECCF-----NILYV...

Basal metazoans:

300479182\_Subc.dom.Porifera
300481107\_Subc.dom.Porifera
241976231\_Leuc.clo.Porifera
193864166\_Ocaalob.Porifera
110578524\_Ocaalob.Porifera
295904352\_Tric.adh.Plaocozoa
295904352\_Tric.adh.Plaocozoa
295907458\_Tric.adh.Plaocozoa
162118304\_Nema.vec.Chnidaria
62870197\_Nema.vec.Chnidaria
162079661\_Nema.vec.Chnidaria
219241711\_Anem.vir.Chnidaria
163715734\_Metr.nec.Chnidaria
295904352\_Tric.adh.Plaocozoa
256982685\_Acro.ml.Chnidaria
282477148\_Acro.pal.Chnidaria
282495759\_Acro.pal.Chnidaria
282495759\_Acro.pal.Chnidaria
34828241\_Hydr.vul.Chnidaria
167800752\_Clyt.hem.Chnidaria

Ecdysozoans:

55912102\_Locu.miq.Arthropoda/Hexapoda
268299600\_Dend.pon.Arthropoda/Hexapoda
268213541\_Dend.pon.Arthropoda/Hexapoda
110100579\_Apis.mel.Arthropoda/Hexapoda
111000486\_Apis.mel.Arthropoda/Hexapoda
122937095\_Lasi.nig.Arthropoda/Hexapoda
116355752\_Homa.vit.Arthropoda/Hexapoda
190600310\_Haem.vit.Arthropoda/Hexapoda
160548759\_Dana.ele.Arthropoda/Hexapoda
160517532\_Homa.vit.Arthropoda/Crustacea
282195458\_Erio.sin.Arthropoda/Crustacea
282195458\_Erio.sin.Arthropoda/Crustacea
183545596\_Ende.apl.Arthropoda/Chelicerata
165979979\_Caen.bre.Nematoda
171978288\_Caen.jap.Nematoda
102789986\_Caen.ele.Nematoda
1118041\_Caen.rem.Nematoda
3125200\_Melo.chi.Nematoda
159496538\_Rado.sim.Nematoda
1823495\_Caen.ele.Nematoda
162703557\_Acro.aul.Nematoda
162044334\_Ancy.cen.Nematoda
10299141\_Caen.ele.Nematoda
282620981\_Mln.tar.Tardigrada

Lophotrochozoans:

116288951\_Capit.tel.Annelida
301574464\_Alvil.pon.Annelida
16124622\_Hirid.med.Annelida
84596563\_Schm.med.Platyhelminthes
22526145\_Brac.pli.Rotifera
225249345\_Brac.pli.Rotifera
283995981\_Tubu.sp.Euryzoa
238686075\_Mere.mer.Mollusca
313364059\_Cras.gig.Mollusca
212829760\_Mytil.cal.Mollusca
283995981\_Tubu.sp.Euryzoa
163498585\_Lott.gig.Mollusca
14818264\_Lymn.ata.Mollusca
22598199\_Cras.gig.Mollusca
152181490\_Cras.vir.Mollusca
262344882\_Hali.asi.Mollusca
163484735\_Lott.gig.Mollusca
148316223\_Lymn.ata.Mollusca
212829760\_Mytil.cal.Mollusca
260305929\_Cras.gig.Mollusca
313290855\_Cras.gig.Mollusca
31904597\_Cras.vir.Mollusca
31904597\_Cras.vir.Mollusca
84430259\_Eupr.sco.Mollusca
238688811\_Mere.mer.Mollusca
31329716\_Cras.gig.Mollusca
163509007\_Lott.gig.Mollusca
164599920\_Yene.phl.Mollusca

Deuterostomes:

11667313\_Xeno.boc.Xenoturbellida
57925990\_Stro.pur.Echinodermata
193940886\_Para.liv.Echinodermata
93296730\_Pati.pac.Echinodermata
193947621\_Para.liv.Echinodermata
193947621\_Para.liv.Echinodermata
34753691\_Stro.pur.Echinodermata
139259964\_Para.liv.Echinodermata
187046340\_Sacc.kow.Hemichordata
187046340\_Sacc.kow.Hemichordata
187194370\_Sacc.kow.Hemichordata
187194370\_Sacc.kow.Hemichordata (domain1)
187194370\_Sacc.kow.Hemichordata (domain2)
187194370\_Sacc.kow.Hemichordata (domain3)
18708391\_Sacc.kow.Hemichordata (domain3)
169555739\_Bran.flo.Chordata/Cephalochordata
17795741\_Bran.flo.Chordata/Cephalochordata
66280481\_Bran.flo.Chordata/Cephalochordata
66285540\_Bran.flo.Chordata/Cephalochordata
67790958\_Moly.tec.Chordata/Tunicata
187046340\_Sacc.kow.Hemichordata
184061189\_Clon.int.Chordata/Tunicata
117760331\_Halo.zor.Chordata/Tunicata
314008648\_Oiko.dio.Chordata/Tunicata
61961631\_Molg.tec.Chordata/Tunicata
69294088\_Halo.zor.Chordata/Tunicata
24604919\_Clon.int.Chordata/Tunicata
184102615\_Clon.int.Chordata/Tunicata
4774457\_Clon.int.Chordata/Tunicata
51760129\_Clon.sav.Chordata/Tunicata
184061189\_Clon.int.Chordata/Tunicata
184081293\_Clon.int.Chordata/Tunicata
51691721\_Clon.sav.Chordata/Tunicata
24604919\_Clon.int.Chordata/Tunicata
184061189\_Clon.int.Chordata/Tunicata
184061189\_Clon.int.Chordata/Tunicata
184061189\_Clon.int.Chordata/Tunicata

**Figure S7. WBP1/VOPP1 proteins deduced from ESTs.** The sequences are denoted by NCBI gene identification (gi) numbers followed by species abbreviations and their phylums. More detailed taxonomy information is shown for arthropods. Conserved cysteines are shaded in **yellow**. Predicted transmembrane segments are **underlined**. The four consecutive positions with mainly aromatic residues are shaded in **red**. Cysteines and positively charged residues (arginines and lysines) near the C-terminal ends of predicted transmembrane segments are shown as **red** and **blue** letters, respectively. PY motifs (PPxY or LPxY) in the C-terminal regions after the predicted transmembrane segments are colored in **cyan**. Two sequences with tandem cysteine-rich domains are marked by **green** and **blue** gi numbers respectively. Species abbreviations are as follows: Acro.mil, *Acropora millepora*; Acro.pal, *Acropora palmata*; Alvi.pom, *Alvinella pompejana*; Ancy.can, *Ancylostoma caninum*; Anem.vir, *Anemonia viridis*; Apis.mel, *Apis mellifera*; Aply.cal, *Aplysia californica*; Asca.suu, *Ascaris suum*; Brac.pli, *Brachionus plicatilis*; Bran.flo, *Branchiostoma floridae*; Caen.bre, *Caenorhabditis brenneri*; Caen.ele, *Caenorhabditis elegans*; Caen.jap, *Caenorhabditis japonica*; Caen.rem, *Caenorhabditis remanei*; Capi.tel, *Capitella teleta*; Cion.int, *Ciona intestinalis*; Cion.sav, *Ciona savignyi*; Clyt.hem, *Clytia hemisphaerica*; Cras.gig, *Crassostrea gigas*; Cras.vir, *Crassostrea virginica*; Dana.ple, *Danaus plexippus*; Dend.pon, *Dendroctonus ponderosae*; Ende.spi, *Endeis spinosa*; Erio.sin, *Eriocheir sinensis*; Eupr.sco, *Euprymna scolopes*; Hali.asi, *Haliotis asinina*; Halo.ror, *Halocynthia roretzi*; Hiru.med, *Hirudo medicinalis*; Homa.vit, *Homalodisca vitripennis*; Homa.ame, *Homarus americanus*; Hydr.vul, *Hydra vulgaris*; Lasi.nig, *Lasius niger*; Leuc.cha, *Leucetta chagosensis*; Locu.mig, *Locusta migratoria*; Lott.gig, *Lottia gigantea*; Lymn.sta, *Lymnaea stagnalis*; Melo.chi, *Meloidogyne chitwoodi*; Mere.mer, *Meretrix meretrix*; Metr.sen, *Metridium senile*; Miln.tar, *Milnesium tardigradum*; Molg.tec, *Molgula tectiformis*; Myti.cal, *Mytilus californianus*; Naso.vit, *Nasonia vitripennis*; Nema.vec, *Nematostella vectensis*; Oiko.dio, *Oikopleura dioica*; Osca.car, *Oscarella carmela*; Osca.lob, *Oscarella lobularis*; Para.liv, *Paracentrotus lividus*; Pati.pec, *Patiria pectinifera*; Rado.sim, *Radopholus similis*; Rudi.phi, *Ruditapes philippinarum*; Sacc.kow, *Saccoglossus kowalevskii*; Schm.med, *Schmidtea mediterranea*; Stro.pur, *Strongylocentrotus purpuratus*; Sube.dom, *Suberites domuncula*; Tetr.the, *Tetrahymena thermophila*; Tetr.urt, *Tetranychus urticae*; Tric.adh, *Trichoplax adhaerens*; Tubu.sp., *Tubulipora* sp.; Xeno.boc, *Xenoturbella bocki*.
