# Supplementary material
Source: PubMed Central journal article supplement (PMC3295595)
Supplement: NIHMS352120-supplement-09.pdf [file NIHMS352120-supplement-09.pdf]

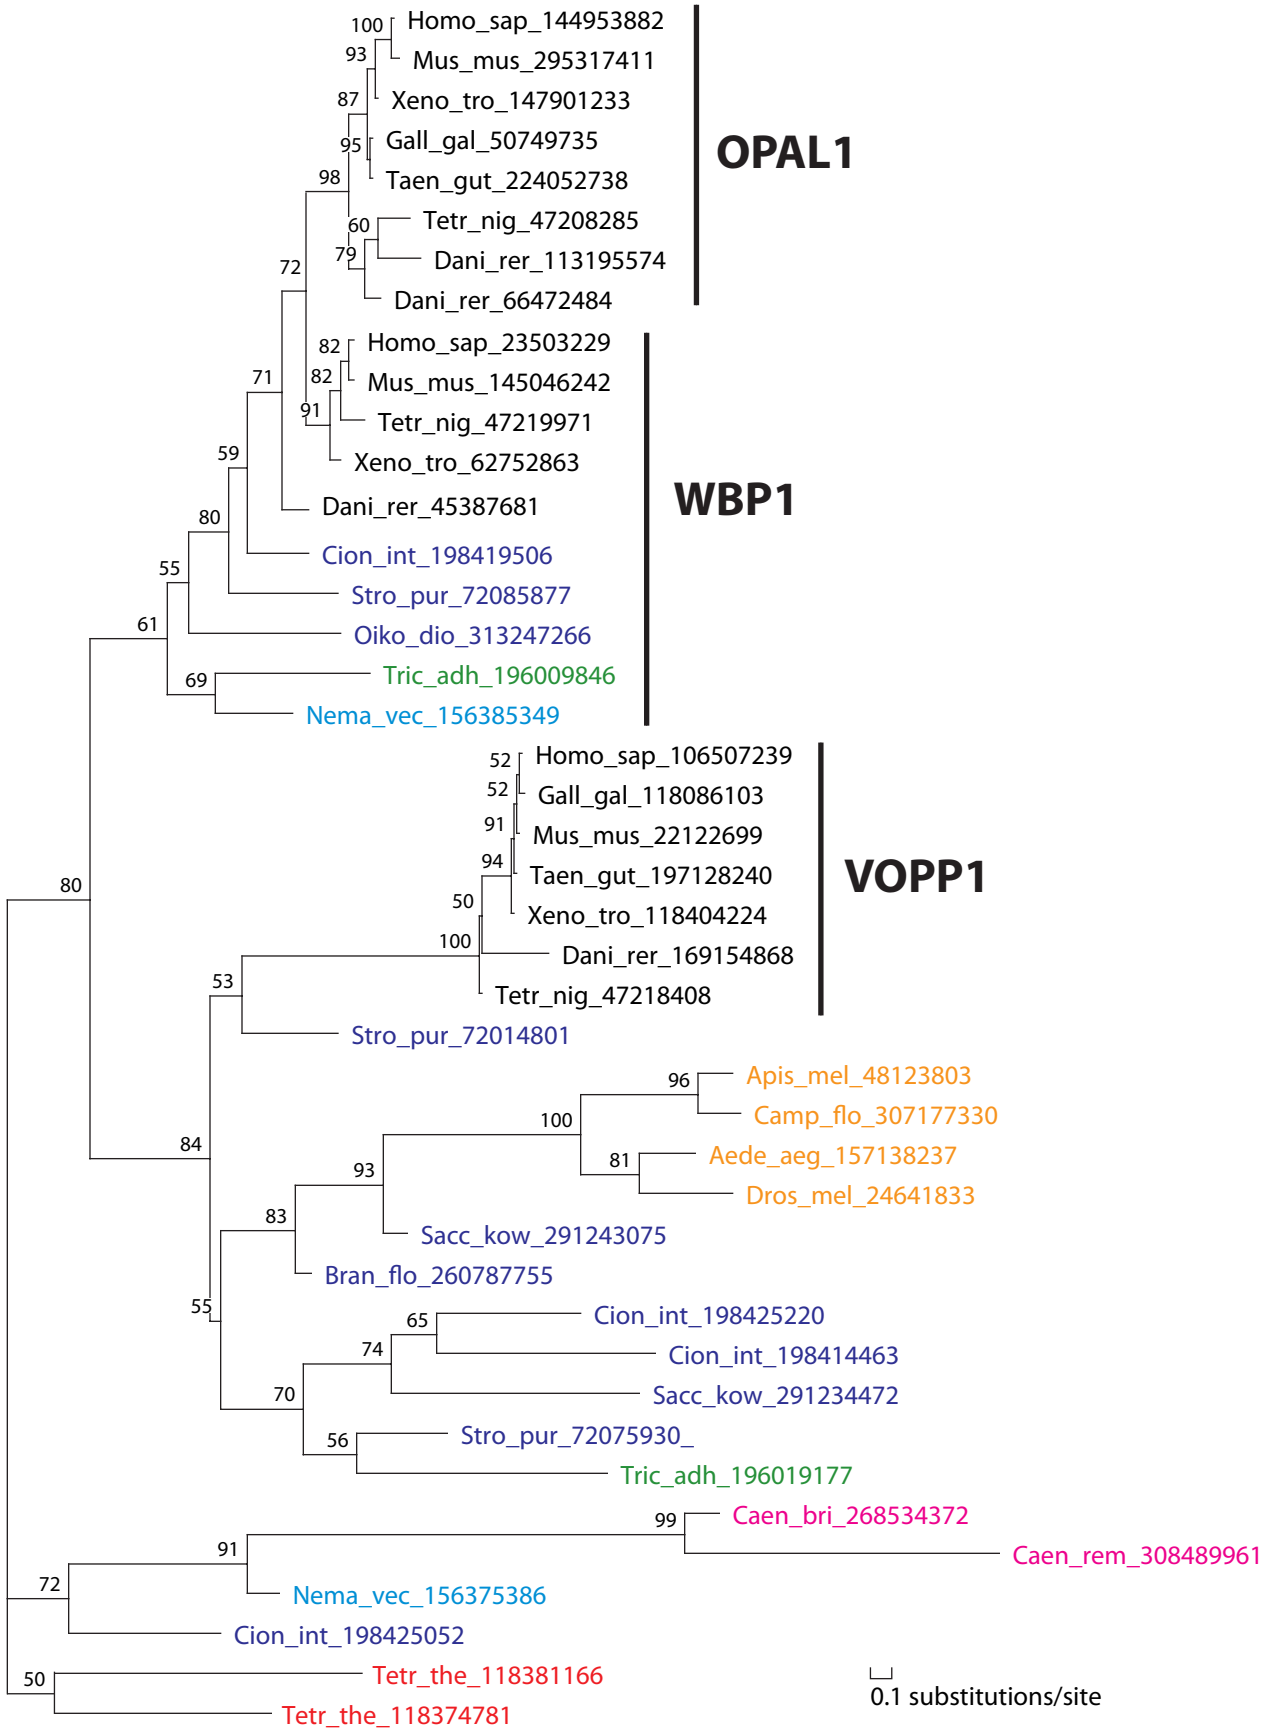

**Figure S12. Phylogenetic reconstruction of WPB1/VOPP1 family proteins by MOLPHY.** Each sequence is denoted by its species abbreviation and gi number. Color coding for sequence names is as follows: black, vertebrates; blue, other deuterostomes; orange, insects; magenta, nematodes; cyan, cnidarians; green, placozoans and red, ciliates. Species abbreviations are as follows: Aede\_aeg, *Aedes aegypti*; Apis\_mel, *Apis mellifera*; Bran\_flo, *Branchiostoma floridae*; Caen\_bri, *Caenorhabditis briggsae*; Caen\_rem, *Caenorhabditis remanei*; Camp\_flo, *Camponotus floridanus*; Cion\_int, *Ciona intestinalis*; Dani\_rer, *Danio rerio*; Dros\_mel, *Drosophila melanogaster*; Gall\_gal, *Gallus gallus*; Homo\_sap, *Homo sapiens*; Mus\_mus, *Mus musculus*; Nema\_vec, *Nematostella vectensis*; Oiko\_dio, *Oikopleura dioica*; Sacc\_kow, *Saccoglossus kowalevskii*; Stro\_pur, *Strongylocentrotus purpuratus*; Taen\_gut, *Taeniopygia guttata*; Tetr\_the, *Tetrahymena thermophila*; Tetr\_nig, *Tetraodon nigroviridis*; Tric\_adh, *Trichoplax adhaerens*; and Xeno\_tro, *Xenopus tropicalis*.

**Figure S12. Phylogenetic reconstruction of WPB1/VOPP1 family proteins by MOLPHY.** Each sequence is denoted by its species abbreviation and gi number. Color coding for sequence names is as follows: black, vertebrates; blue, other deuterostomes; orange, insects; magenta, nematodes; cyan, cnidarians; green, placozoans and red, ciliates. Species abbreviations are as follows: Aede\_aeg, *Aedes aegypti*; Apis\_mel, *Apis mellifera*; Bran\_flo, *Branchiostoma floridae*; Caen\_bri, *Caenorhabditis briggsae*; Caen\_rem, *Caenorhabditis remanei*; Camp\_flo, *Camponotus floridanus*; Cion\_int, *Ciona intestinalis*; Dani\_rer, *Danio rerio*; Dros\_mel, *Drosophila melanogaster*; Gall\_gal, *Gallus gallus*; Homo\_sap, *Homo sapiens*; Mus\_mus, *Mus musculus*; Nema\_vec, *Nematostella vectensis*; Oiko\_dio, *Oikopleura dioica*; Sacc\_kow, *Saccoglossus kowalevskii*; Stro\_pur, *Strongylocentrotus purpuratus*; Taen\_gut, *Taeniopygia guttata*; Tetr\_the, *Tetrahymena thermophila*; Tetr\_nig, *Tetraodon nigroviridis*; Tric\_adh, *Trichoplax adhaerens*; and Xeno\_tro, *Xenopus tropicalis*.
