# Supplementary material
Source: PubMed Central journal article supplement (PMC3295595)
Supplement: NIHMS352120-supplement-10.pdf [file NIHMS352120-supplement-10.pdf]

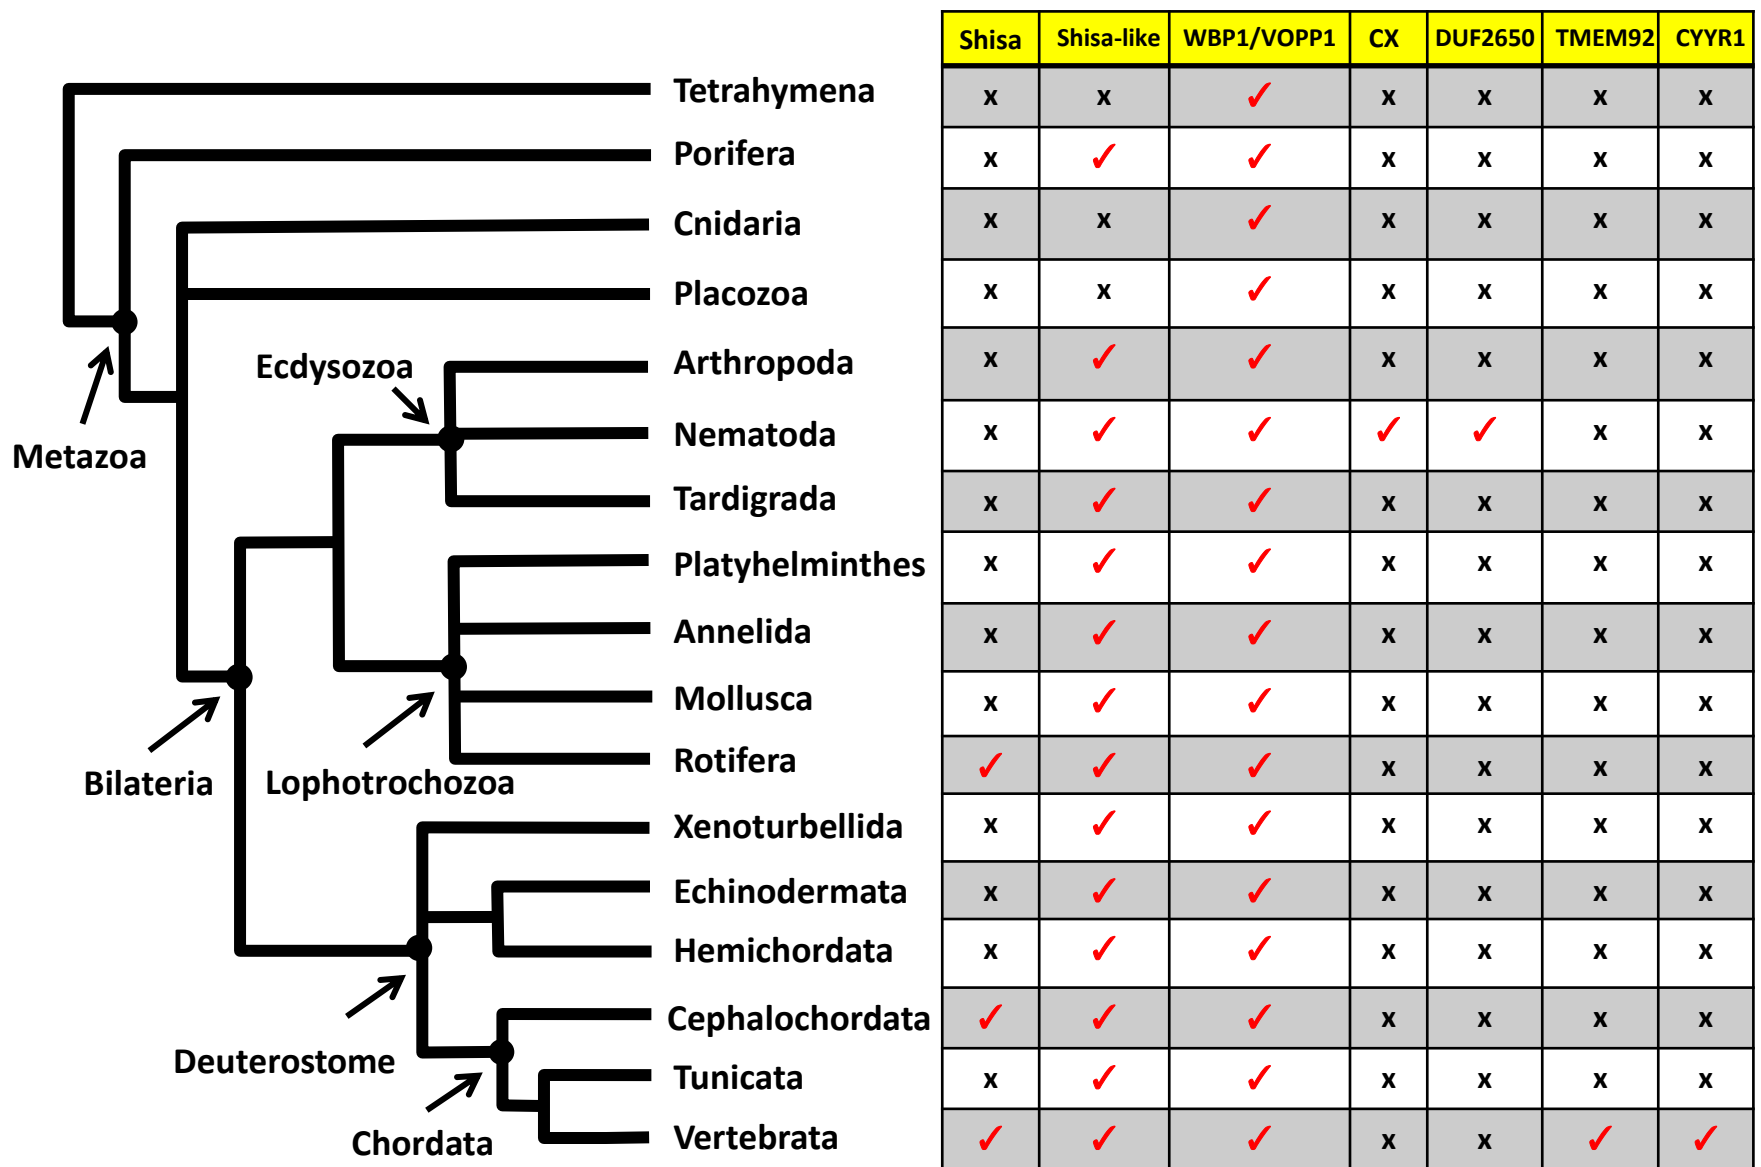

**Figure S13. Phylogenetic distribution of STMC6 protein families.** Presence and absence are denoted by '✓' and 'x' respectively.
